# Supplementary material for: Highly stable biomolecule supported by gold nanoparticles/graphene nanocomposite as a sensing platform for H2O2biosensor application
Source: Royal Society of Chemistry journal article supplement (doi:10.1039/c6tb01576j), 2016-01-01
Supplement: c6tb01576j1.pdf [file c6tb01576j1.pdf]

## Supporting information

### **Highly stable biomolecule supported gold nanoparticles/graphene nanocomposite as a sensing platform for H<sub>2</sub>O<sub>2</sub> biosensor application**

Balamurugan Thirumalraj,<sup>a</sup> Chellakannu Rajkumar,<sup>a</sup> Shen-Ming Chen,<sup>a\*</sup> and Palani Barathi,<sup>b</sup>

<sup>a</sup>Department of Chemical Engineering and Biotechnology, National Taipei University of Technology, No.1, Section 3, Chung-Hsiao East Road, Taipei 106, Taiwan (ROC).

<sup>b</sup>Electrochemical Energy Research Lab, Centre for Nanoscience and Technology, Pondicherry University, Puducherry, 605014, India.

\* Corresponding author. Fax: +886 2270 25238; Tel: +886 2270 17147

E-mail: [smchen78@ms15.hinet.net](mailto:smchen78@ms15.hinet.net)

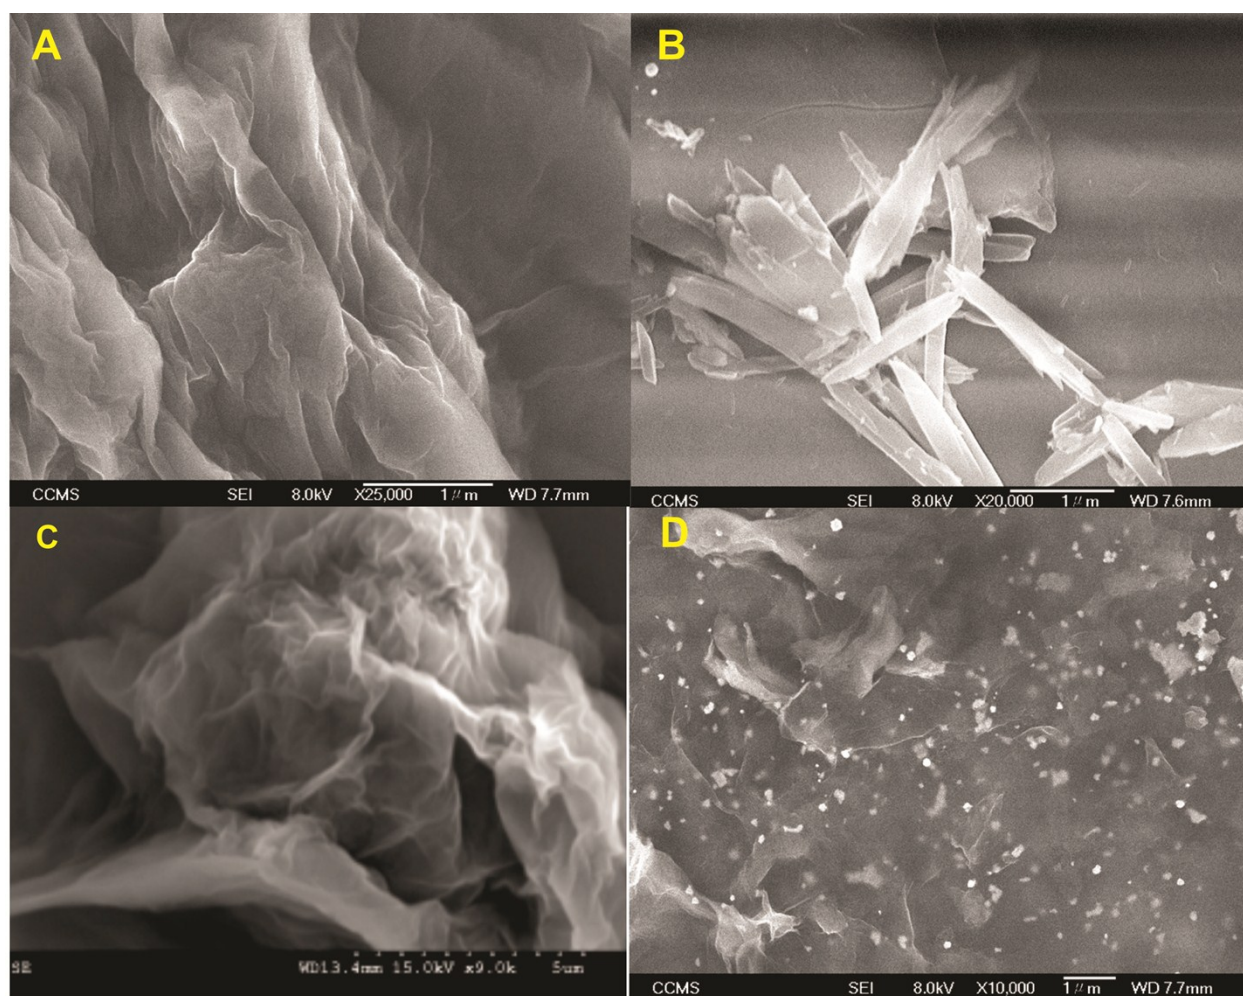

**Figure S1.** FE-SEM images of GO (A), HN (B), HN-RGO (C) and HN-RGO/AuNPs (D) composites.

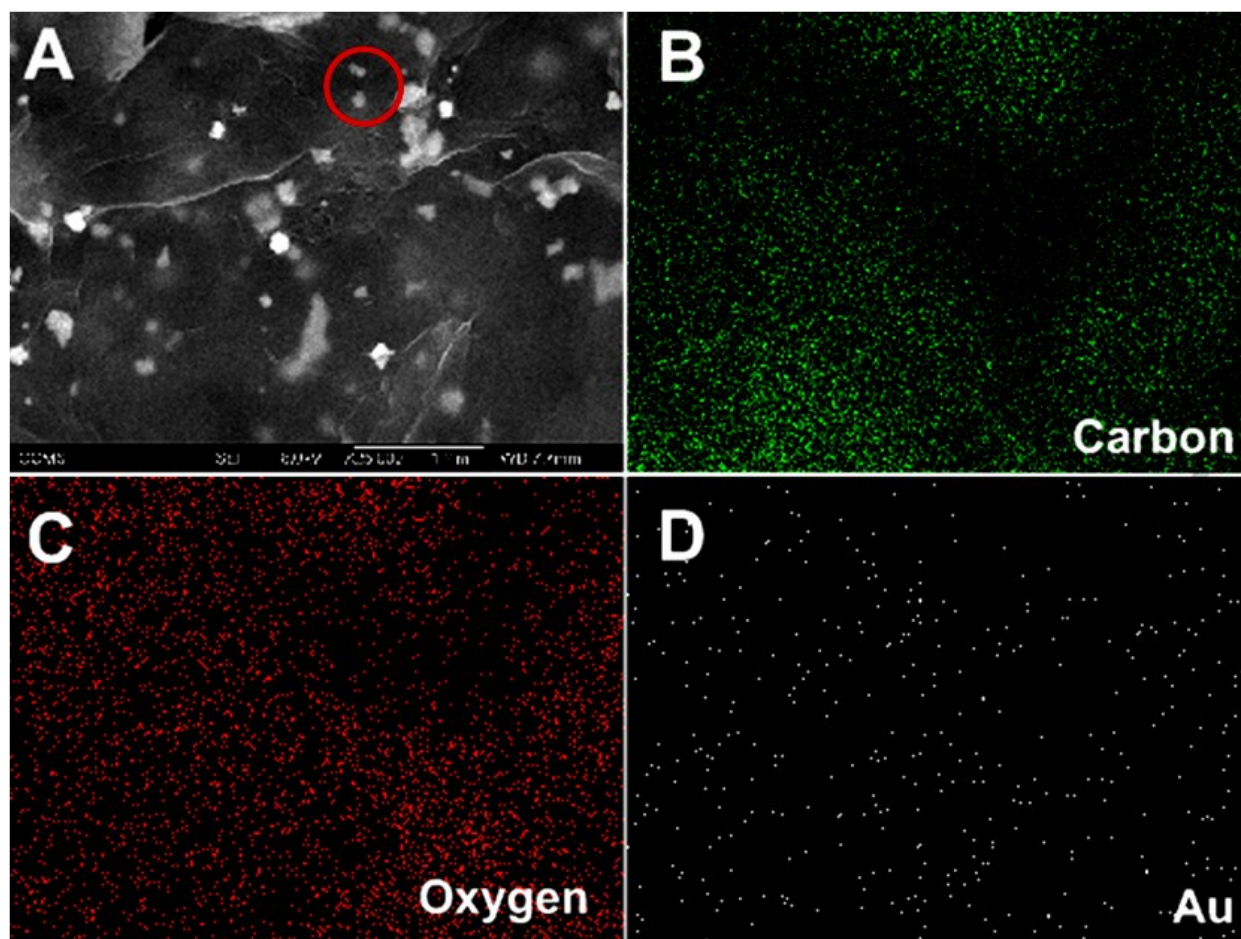

**Figure S2.** FE-SEM image of HN-RGO/AuNPs composite (A) and the corresponding EDX elemental mapping of carbon (B), oxygen (C) and gold (D) nanoparticles.

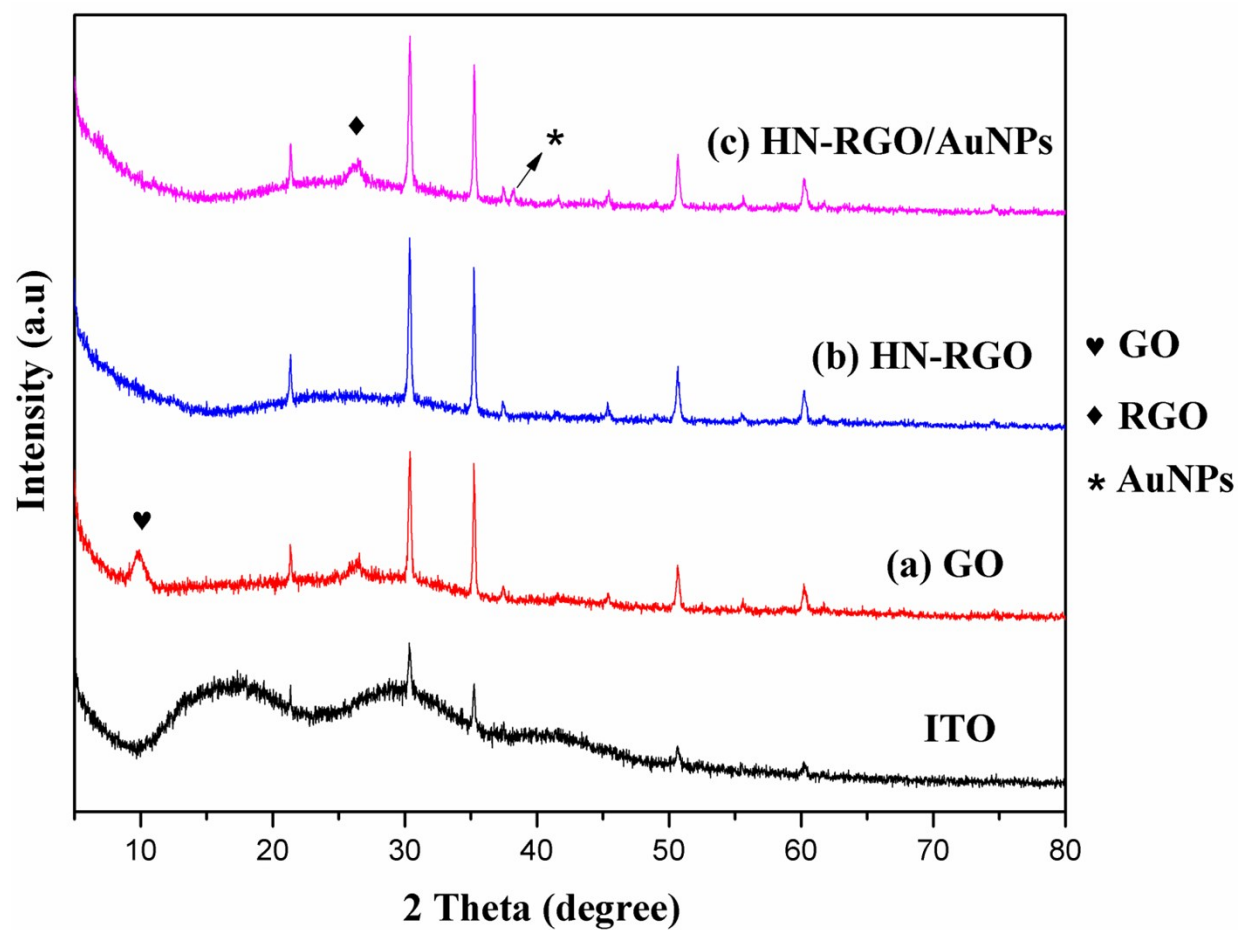

**Figure S3.** XRD patterns for GO (a), HN-RGO (b), HN-RGO/AuNPs (c) composite.

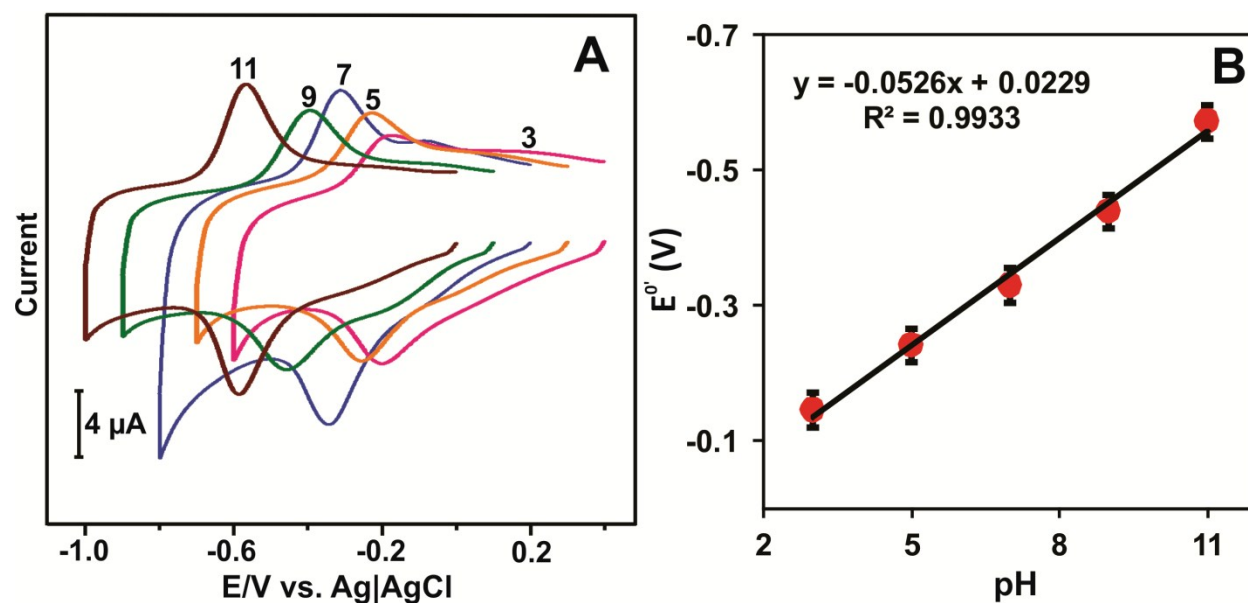

**Figure S4.** (A) CV response obtained at HN-RGO/AuNPs modified electrode in  $N_2$  saturated different pH solutions (3–11) at a scan rate of  $100 \text{ mVs}^{-1}$ . (B) The calibration plot for pH vs.  $E^0$ .

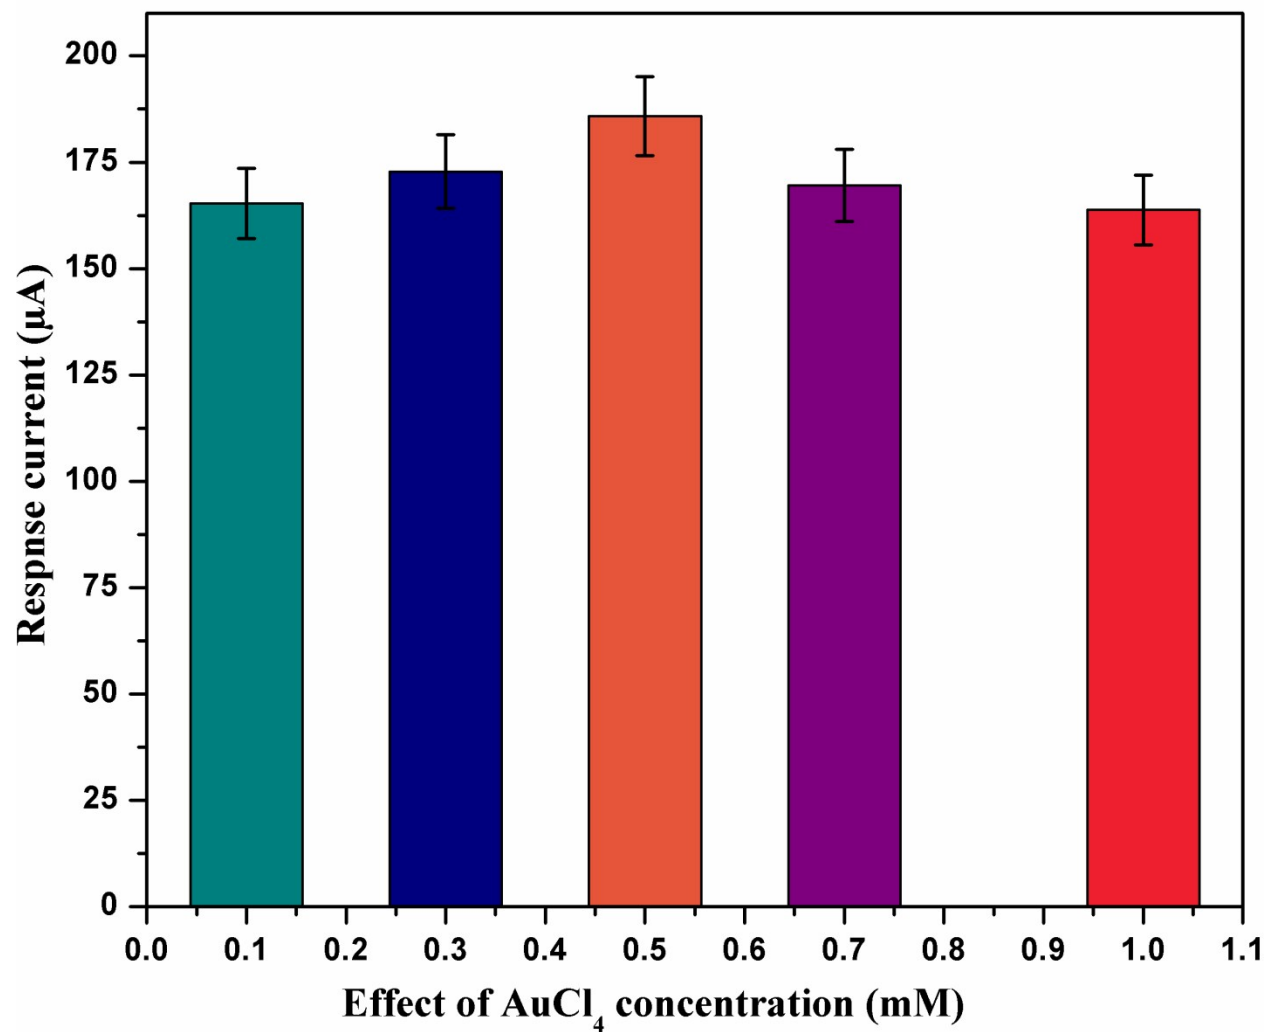

**Figure S5.** Effect of AuNPs using different  $\text{AuCl}_4$  concentrations on HN-RGO/AuNPs composite towards  $\text{H}_2\text{O}_2$  detection.
